# Supplementary material
Source: publisher site journal article supplement (https://www.spandidos-publications.com/2893/downloadSupplementary)

Figure S1. Immunofluorescence detection of a specific marker (RPE65) of ARPE19 cells. RPE65 (green), DAPI (blue). Scale bar=100  $\mu$ m. RPE65, retinal pigment epithelium-specific 65 kDa protein.

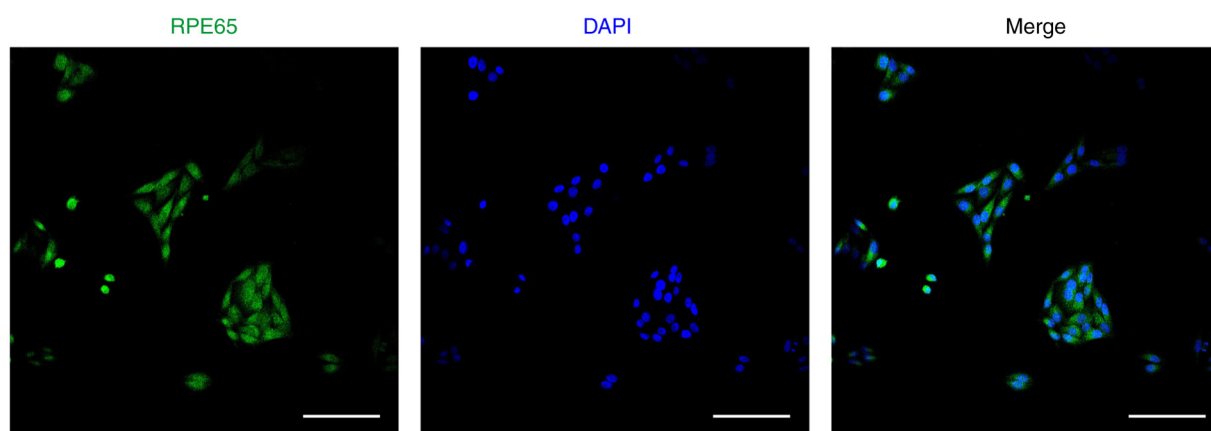

Figure S2. Detection of CTGF-ASODN knockdown efficiency by reverse transcription-quantitative PCR in ARPE19 cells. n=3. \*\*\*P<0.001 vs. control group. CTGF-ASODN. CTGF, connective tissue growth factor antisense oligonucleotide.

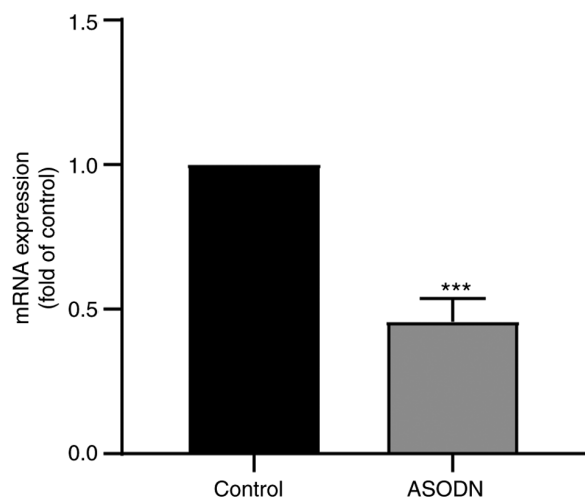

Supplement: Supplementary file 1 [file downloadSupplementary]
